# Supplementary material for: Aspergillus Enhances Eosinophil and Neutrophil Extracellular DNA Trap Formation in Chronic Rhinosinusitis
Source: MDPI journal article supplement (doi:10.3390/ijms242417264), 2023-12-08
Supplement: s1 [file s1]

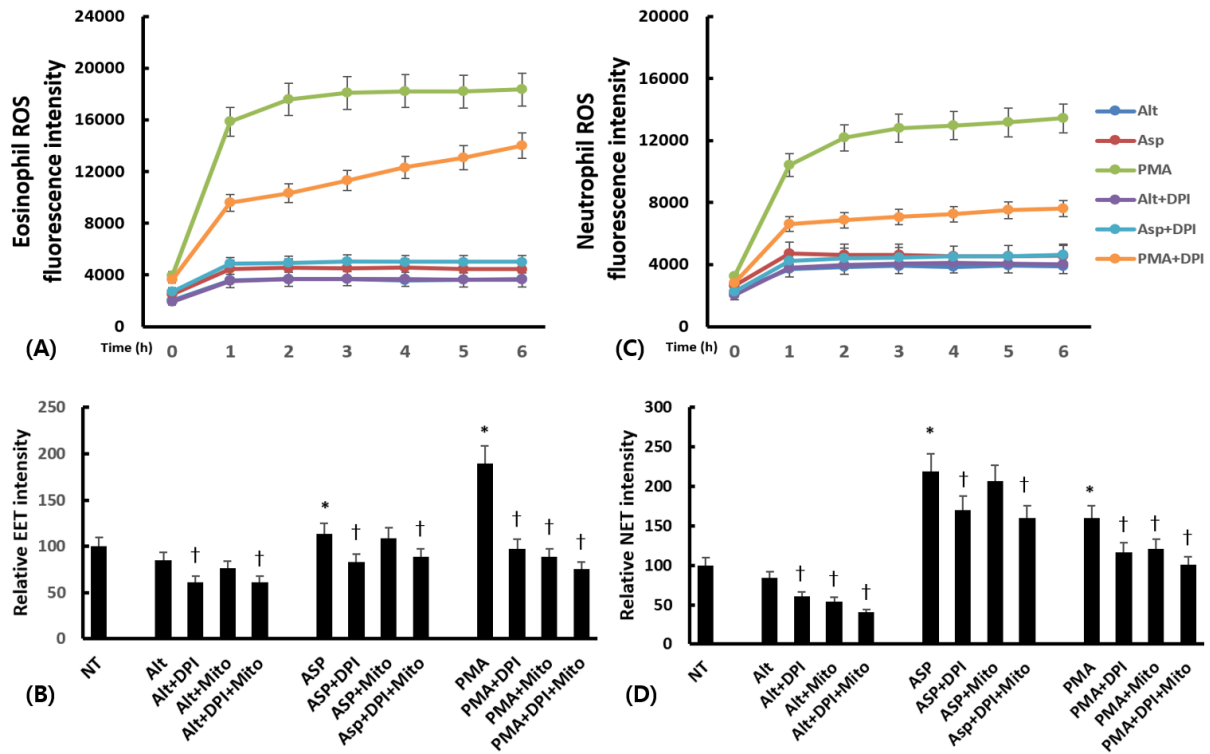

Figure S1. The effect of reactive oxygen species (ROS) on EET or NET formation in non-eosinophilic chronic rhinosinusitis by fungi. *Alternaria alternata* (Alt) and *Aspergillus fumigatus* (Asp) enhanced intracellular ROS production in a time-dependent manner (A and B). Nicotinamide adenine dinucleotide phosphate-oxidase inhibitor, diphenyleneiodonium (DPI), significantly suppressed both *Aspergillus*-induced EET and NET formation (C and D). PMA was used as a positive control. NT: not-treated, Mito: mitochondrial ROS inhibitor, MitoTempo, \*  $p < 0.05$  compared with NT, †  $p < 0.05$  compared with Alt,  $n = 5$ .

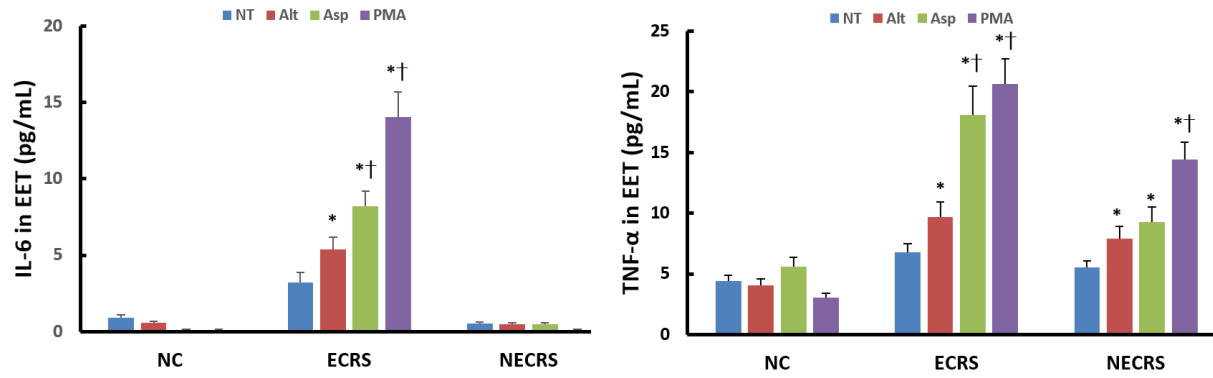

Figure S2. Interleukine-6 (IL-6) and tumor necrosis factor (TNF)- $\alpha$  concentration in eosinophilic extracellular traps (EETs). *Alternaria alternata* (Alt) and *Aspergillus fumigatus* (Asp) strongly induced IL-6 production from eosinophils in eosinophilic chronic rhinosinusitis (ECR) and TNF- $\alpha$  production from eosinophils in ECRS and eosinophilic chronic rhinosinusitis (NECRS). *Aspergillus* significantly enhanced IL-6 and TNF- $\alpha$  production compared to *Alternaria*. PMA was used as a positive control. NC: normal control, NT: not-treated, \*  $p < 0.05$  compared with NC, †  $p < 0.05$  compared with Alt,  $n = 5$ .
